# Supplementary material for: Responses in Plant Growth and Root Exudates of Pistia stratiotes under Zn and Cu Stress
Source: MDPI journal article supplement (doi:10.3390/plants13050736), 2024-03-05
Supplement: s1 [file s1]

## Supplementary Materials

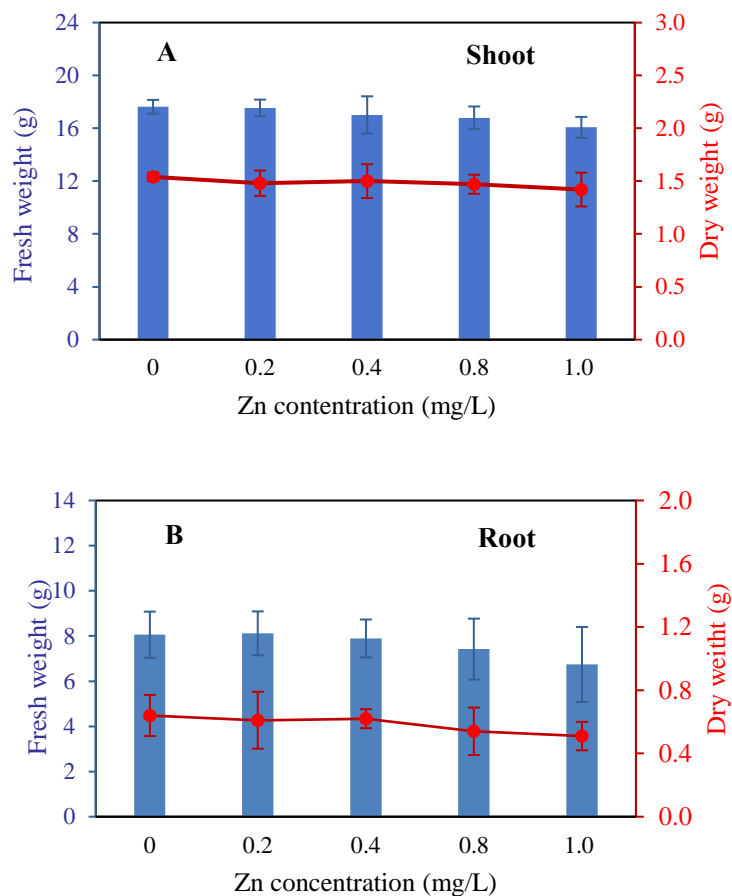

**Figure S1.** (A,B) The growth of *P. stratiotes* after exposure to the low concentrations of Zn (0, 0.2, 0.4, 0.8, 1.0 mg/L) for 20 days.

**Table S1.** Root exudate compounds and relative amount of *P. stratiotes*.

| Compounds                                                                               | Formula                                        | Relative Amount (%) |      |      |
|-----------------------------------------------------------------------------------------|------------------------------------------------|---------------------|------|------|
|                                                                                         |                                                | CK                  | Zn   | Cu   |
| 2-Phenylethanethiol, TMS derivative                                                     | C <sub>11</sub> H <sub>18</sub> SSi            | 0.2                 | —    | —    |
| 3-Propylnorleucine                                                                      | C <sub>9</sub> H <sub>19</sub> NO <sub>2</sub> | 0.6                 | —    | —    |
| 2,4-Di-tert-butylphenol                                                                 | C <sub>14</sub> H <sub>22</sub> O              | 1.75                | 1.8  | 1.35 |
| 1-Heptatriacotanol                                                                      | C <sub>37</sub> H <sub>76</sub> O              | 0.25                | —    | 0.8  |
| 1-Pentanol, 2-ethyl-4-methyl-                                                           | C <sub>8</sub> H <sub>18</sub> O               | 3.45                | 4.3  | 4.25 |
| E,E,Z-1,3,12-Nonadecatriene-5,14-diol                                                   | C <sub>19</sub> H <sub>34</sub> O <sub>2</sub> | 0.2                 | —    | 0.2  |
| 1,4-Methanoazulen-3-ol,<br>decahydro-1,5,5,8a-tetramethyl-,<br>[1S-(1à,3á,3aá,4à,8aá)]- | C <sub>15</sub> H <sub>26</sub> O              | —                   | 0.25 | —    |

|                                                               |             |       |       |      |
|---------------------------------------------------------------|-------------|-------|-------|------|
| 1-Decanol, 2-hexyl-                                           | C16H34O     | —     | 0.25  | 0.6  |
| 1-Eicosanol                                                   | C20H42O     | —     | 0.25  | —    |
| 1-Hexadecanol                                                 | C16H34O     | —     | 0.8   | 0.4  |
| 2-Hexyl-1-octanol                                             | C14H30O     | —     | 0.4   | —    |
| Azulene                                                       | C10H8       | —     | 0.6   | 0.6  |
| p-Xylene                                                      | C8H10       | 0.5   | 0.35  | 0.35 |
| Benzene, 1,3-dimethyl-                                        | C8H10       | —     | 0.25  | —    |
| Phenol,                                                       |             |       |       |      |
| 2,2'-methylenebis[6-(1,1-dimethylethyl)-4-methyl-             | C23H32O2    | 20.45 | 14.35 | 14.2 |
| 17-Pentatriacontene                                           | C35H70      | 1.7   | 1.2   | 0.8  |
| 7,9-Di-tert-butyl-1-oxaspiro(4,5)deca-6,9-diene-2,8-di<br>one | C17H24O3    | 1.15  | 4.5   | 0.5  |
| 2,4-Dimethyl-5,6-dimethoxy-8-aminoquinoline                   | C13H16N2O2  | —     | 0.25  | —    |
| tert-Hexadecanethiol                                          | C16H34S     | 0.4   | 0.65  | 0.3  |
| 10-Octadecenal                                                | C18H34O     | 0.25  | —     | —    |
| Benzaldehyde, 2,4-dimethyl-                                   | C9H10O      | 0.45  | —     | —    |
| Hexanal, 2-ethyl-                                             | C8H16O      | 0.85  | —     | —    |
| 5-Octadecenal                                                 | C18H34O     | —     | 0.45  | —    |
| Benzaldehyde, 3,4-dimethyl-                                   | C9H10O      | —     | 0.55  | 0.45 |
| Octadecanal, 2-bromo-                                         | C18H35BrO   | —     | 0.2   | —    |
| Eicosanal-                                                    | C20H40O     | —     | —     | 0.25 |
| 3-Hydroxypropyl palmitate, TMS derivative                     | C22H46O3Si  | 0.2   | 0.35  | 0.3  |
| Fumaric acid, hexadecyl propargyl ester                       | C23H38O4    | —     | —     | 0.2  |
| Carbonic acid, tetradecyl 2,2,2-trichloroethyl ester          | C17H31Cl3O3 | —     | —     | 0.35 |
| Bicyclo[4.4.1]undeca-1,3,5,7,9-pentaene                       | C11H10      | 0.5   | 0.45  | —    |
| Cyclopentane, 1-methyl-2-(4-methylpentyl)-, trans-            | C12H24      | —     | 0.2   | 0.2  |
| Ethylbenzene                                                  | C8H10       | —     | —     | 0.25 |
| Heptasiloxane, hexadecamethyl-                                | C16H48O6Si7 | —     | —     | 0.25 |
| Hexadecane, 1-iodo-                                           | C16H33I     | —     | —     | 0.4  |
| Heptacosane, 1-chloro-                                        | C27H55Cl    | —     | —     | 0.35 |
| 1-Cyclopentyleicosane                                         | C25H50      | 0.2   | —     | —    |
| 1-Iodo-2-methylundecane                                       | C12H25I     | 0.5   | —     | —    |
| 2-Methylhexacosane                                            | C27H56      | 0.7   | —     | —    |
| 5,5-Diethylheptadecane                                        | C21H44      | 0.2   | —     | —    |
| Dodecane, 2,7,10-trimethyl-                                   | C15H32      | 0.3   | —     | —    |
| Eicosane, 2,4-dimethyl-                                       | C22H46      | 0.2   | —     | —    |
| Heneicosane, 11-(1-ethylpropyl)-                              | C26H54      | 0.35  | —     | —    |
| Hexadecane, 1,1-bis(dodecyloxy)-                              | C40H82O2    | 0.8   | 0.5   | 0.65 |
| Hexadecane, 2,6,11,15-tetramethyl-                            | C20H42      | 9.9   | 7.05  | 3.45 |
| Nonadecane, 2-methyl-                                         | C20H42      | 0.2   | —     | —    |
| Octadecane, 3-ethyl-5-(2-ethylbutyl)-                         | C26H54      | 1.1   | 1.4   | 0.6  |
| Pentadecane, 2,6,10,14-tetramethyl-                           | C19H40      | 0.25  | —     | —    |

|                                                                            |             |      |      |      |
|----------------------------------------------------------------------------|-------------|------|------|------|
| Tetradecane, 2,6,10-trimethyl-                                             | C17H36      | 0.4  | 0.6  | 0.8  |
| Tetrapentacontane, 1,54-dibromo-                                           | C54H108Br2  | 0.35 | —    | 0.45 |
| 2,6,10-Trimethyltridecane                                                  | C16H34      | —    | 1    | 0.35 |
| 2-Methylpentacosane                                                        | C26H54      | —    | 0.2  | 0.2  |
| 5-Butyl-5-ethylheptadecane                                                 | C23H48      | —    | 0.2  | 0.2  |
| Docosane, 11-decyl-                                                        | C32H66      | —    | 0.2  | —    |
| Dodecane, 2,6,11-trimethyl-                                                | C15H32      | —    | 0.8  | 1.25 |
| Eicosane, 2-methyl-                                                        | C21H44      | —    | 0.2  | 0.2  |
| Heptadecane, 2,3-dimethyl-                                                 | C19H40      | —    | 0.45 | —    |
| Hexadecane, 2,6,10,14-tetramethyl-                                         | C20H42      | —    | 0.3  | 0.3  |
| Pentadecane, 2,6,10-trimethyl-                                             | C18H38      | —    | 0.2  | 0.2  |
| Tetracosane, 11-decyl-                                                     | C34H70      | —    | 0.2  | —    |
| Tetradecane, 2-methyl-                                                     | C15H32      | —    | 0.25 | —    |
| Heptadecane, 9-octyl-                                                      | C25H52      | —    | —    | 0.25 |
| N,N-Dimethyldodecanamide                                                   | C14H29NO    | —    | 0.4  | —    |
| Arachidamide, N-ethyl-                                                     | C22H45NO    | —    | —    | 0.6  |
| Deoxyspergualin                                                            | C17H37N7O3  | —    | —    | 0.5  |
| Naphthalene, 2-methyl-                                                     | C11H10      | —    | —    | 1.35 |
| Oleic acid, 3-(octadecyloxy)propyl ester                                   | C39H76O3    | 0.8  | —    | —    |
| Phthalic acid, di(2-propylpentyl) ester                                    | C24H38O4    | 0.9  | 1.05 | 0.95 |
| Digitoxin                                                                  | C41H64O13   | —    | 0.25 | —    |
| 9-Octadecenamide, (Z)-                                                     | C18H35NO    | —    | 1.25 | 1.05 |
| Cyclopentane, undecyl-                                                     | C16H32      | 0.4  | 0.45 | 0.45 |
| Dodecane                                                                   | C12H26      | 2.1  | 2.05 | 1.5  |
| Eicosane                                                                   | C20H42      | 2.6  | 2    | 1.2  |
| Heneicosane                                                                | C21H44      | 1.65 | 0.6  | 1.2  |
| Heptadecane                                                                | C17H36      | 2.6  | 1.9  | 1.5  |
| Hexadecane                                                                 | C16H34      | 0.8  | 1.35 | 0.9  |
| Pentacosane                                                                | C25H52      | 4.3  | 2.6  | 2.85 |
| Pentadecane                                                                | C15H32      | 4.15 | 0.8  | 0.55 |
| Tetracosane                                                                | C24H50      | 0.3  | —    | —    |
| Tetradecane                                                                | C14H30      | 2.25 | 2.7  | 3.15 |
| Nonadecane                                                                 | C19H40      | —    | —    | 0.7  |
| Acetic acid n-octadecyl ester                                              | C20H40O2    | 0.7  | 0.85 | 0.65 |
| Carbonic acid, eicosyl vinyl ester                                         | C23H44O3    | 0.2  | —    | —    |
| Dichloroacetic acid, tetradecyl ester                                      | C16H30Cl2O2 | 0.45 | —    | —    |
| Phthalic acid, hept-4-yl isobutyl ester                                    | C19H28O4    | 0.5  | 0.6  | 0.6  |
| Toluene-4-sulfonic acid,<br>2,7-dioxatricyclo[4.3.1.0(3,8)]dec-10-yl ester | C15H18O5S   | —    | 0.2  | —    |
| 1,3-Benzenedicarboxylic acid, bis(2-ethylhexyl) ester                      | C24H38O4    | —    | —    | 0.2  |
| Didecan-2-yl phthalate                                                     | C28H46O4    | —    | —    | 0.2  |
| Eicosyl heptafluorobutyrate                                                | C24H41F7O2  | —    | —    | 0.25 |

|                                                                                      |             |      |      |      |
|--------------------------------------------------------------------------------------|-------------|------|------|------|
| Octatriacontyl pentafluoropropionate                                                 | C41H77F5O2  | —    | —    | 0.25 |
| Dibutyl phthalate                                                                    | C16H22O4    | 0.85 | 0.75 | 0.85 |
| 1b,4a-Epoxy-2H-cyclopenta[3,4]cyclopropa[8,9]cycloun<br>dec[1,2-b]oxiren-5(1aH)-one, | C28H38O11   | 0.3  | —    | —    |
| 2,7,9,10-tetrakis(acetyloxy)decahydro-3,6,8,8,10a-penta<br>methyl-                   |             |      |      |      |
| Octasiloxane,                                                                        | C16H50O7Si8 | —    | 0.4  | —    |
| 1,1,3,3,5,5,7,7,9,9,11,11,13,13,15,15-hexadecamethyl-                                |             |      |      |      |
| Triacetyl acetate                                                                    | C32H64O2    | —    | 0.2  | —    |
| à-L-Fucopyranose 1,2:3,4-bis(benzeneboronate)                                        | C18H18B2O5  | —    | 0.3  | —    |
| 9-Octadecenenitrile, (Z)-                                                            | C18H33N     | —    | —    | 0.2  |
| 2,6,10-trimethylundecanoic Acid, 2,2,2- trifluoroethyl<br>ester                      | C16H29F3O2  | —    | —    | 0.2  |
